# Supplementary material for: 2-D coordination network of a cyclic amide with a lanthanide metal cation and its columnar stacking
Source: Royal Society of Chemistry journal article supplement (doi:10.1039/b607370k), 2006-01-01
Supplement: b607370k.pdf [file b607370k.pdf]

Electronic Supplementary Material for CrystEngComm  
This Journal is (c) The Royal Society of Chemistry 2006  
**Electronic Supplementary Information**

**2-D Coordination Network of Cyclic Amide with Lanthanide Metal Cation and Its  
Columnar Stacking**

Hyuma Masu, Masahide Tominaga, Kosuke Katagiri, Takako Kato, Isao Azumaya\*

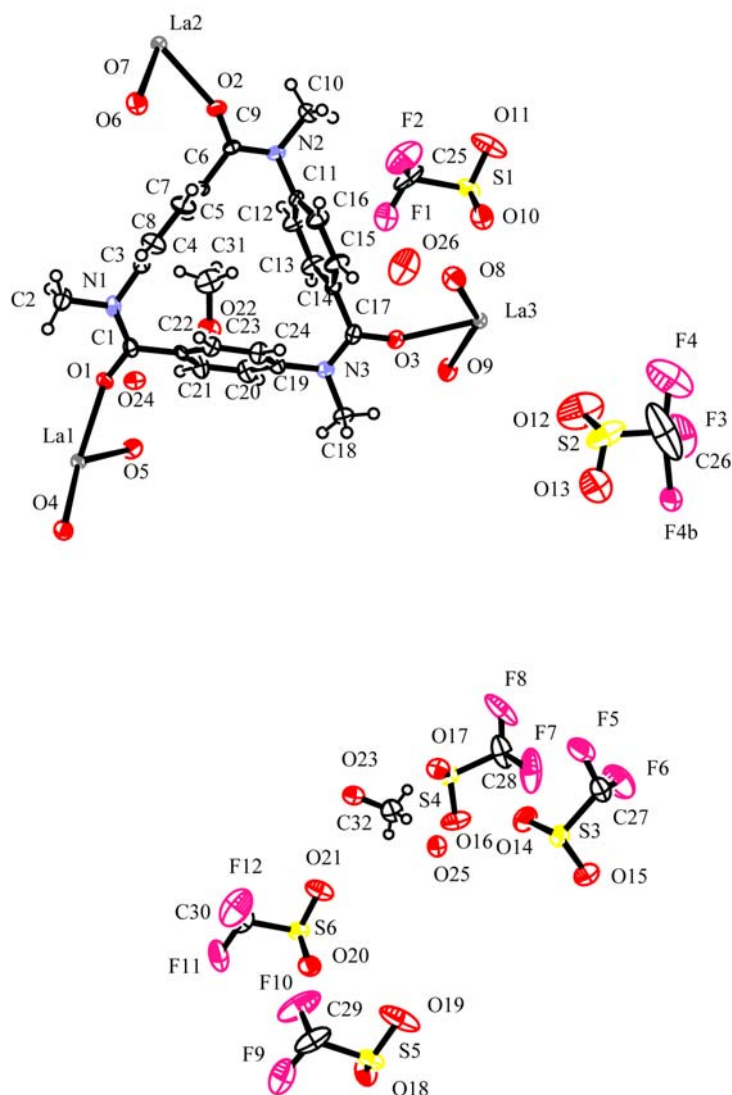

Fig. S1 ORTEP diagram of asymmetric unit in the crystal of **1-La**. The ellipsoids of non-hydrogen atoms are drawn at the 50 % probability level. The positions of hydrogen atoms included in the water and methanol molecules were not calculated. Selected bond lengths (Å) and angles (°): La(1)–O(1) 2.489(4), O(1)–C(1) 1.246(6), C(1)–N(1) 1.345(7), N(1)–C(2) 1.467(7), La(2)–O(2) 2.485(4), O(2)–C(9) 1.237(7), C(9)–N(2) 1.338(7), N(2)–C(10) 1.480(7), La(3)–O(3) 2.484(4), O(3)–C(17) 1.247(6), C(17)–N(3) 1.314(7), N(3)–C(18) 1.469(7), O(1)–La(1)–O(1)<sup>#1</sup> 119.834(12), O(2)–La(2)–O(2)<sup>#2</sup> 119.823(12), O(3)–La(3)–O(3)<sup>#3</sup> 119.811(13), La(1)–O(1)–C(1) 160.0(4), C(22)–C(1)–N(1) 119.0(5), C(1)–N(1)–C(3) 121.1(5), La(2)–O(2)–C(9) 158.9(4), C(6)–C(9)–N(2) 118.5(5), C(9)–N(2)–C(11) 121.4(5), La(3)–O(3)–C(17) 160.2(4), C(14)–C(17)–N(3) 118.8(5), C(17)–N(3)–C(19) 121.0(5). Symmetry transformations used to generate equivalent atoms: #1  $-y+1, x-y+2, z$ . #2  $-y+1, x-y+1, z$ . #3  $-x+y, -x+2, z$ .

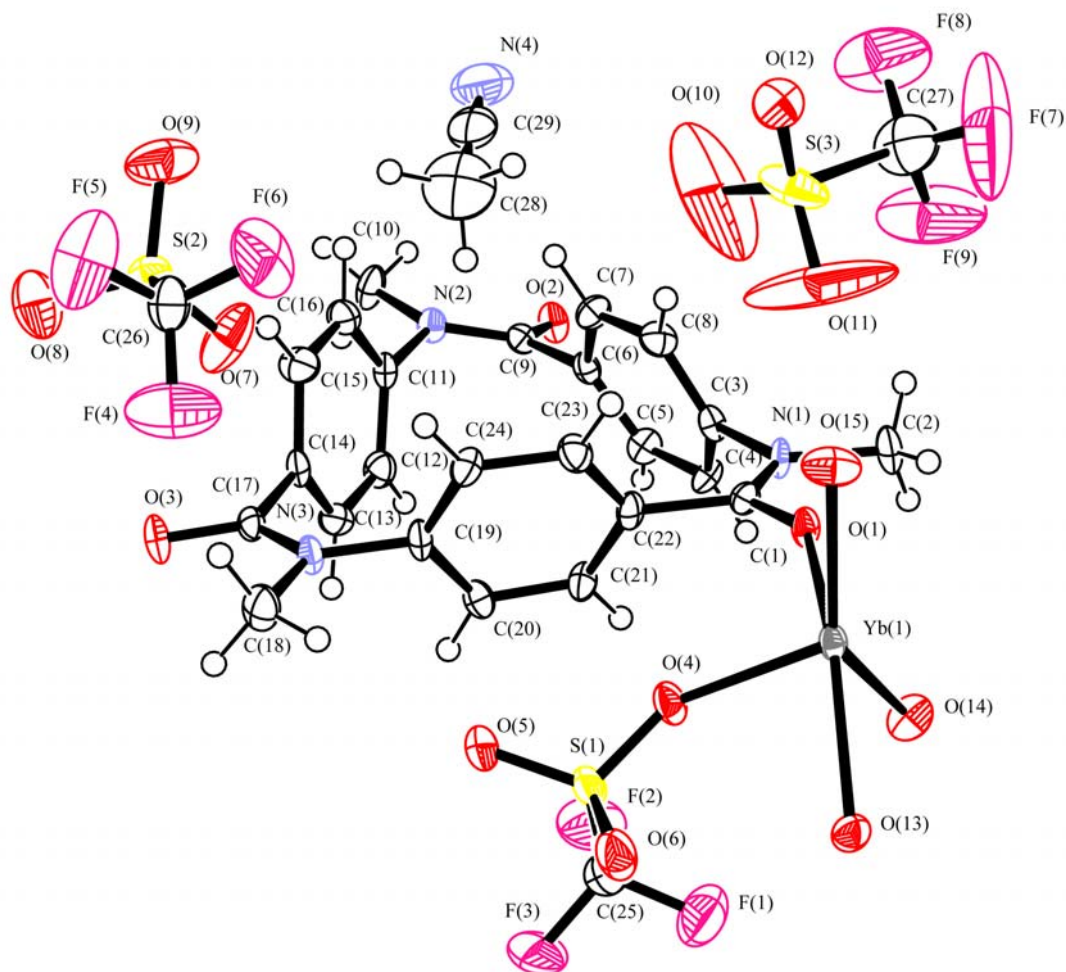

Fig. S2 ORTEP diagram of asymmetric unit in the crystal of **1**-Yb. The ellipsoids of non-hydrogen atoms are drawn at the 50 % probability level. The positions of hydrogen atoms included in the water molecules were not calculated. Selected bond lengths (Å) and angles (°): Yb(1)–O(1) 2.253(3), Yb(1)–O(2)<sup>#2</sup> 2.222(3), Yb(1)–O(3)<sup>#1</sup> 2.185(4), O(1)–C(1) 1.245(5), C(1)–N(1) 1.338(6), N(1)–C(2) 1.481(7), O(2)–C(9) 1.246(4), C(9)–N(2) 1.334(5), N(2)–C(10) 1.475(5), O(3)–C(17) 1.246(5), C(17)–N(3) 1.316(5), N(3)–C(18) 1.485(5), O(1)–Yb(1)–O(2)<sup>#2</sup> 134.37(11), O(2)<sup>#2</sup>–Yb(1)–O(3)<sup>#1</sup> 92.10(12), O(3)<sup>#1</sup>–Yb(1)–O(1) 109.51(12), C(22)–C(1)–N(1) 118.1(4), C(1)–N(1)–C(3) 121.2(5), C(6)–C(9)–N(2) 118.7(3), C(9)–N(2)–C(11) 121.2(3), C(14)–C(17)–N(3) 119.0(3), C(17)–N(3)–C(19) 122.7(3). Symmetry transformations used to generate equivalent atoms: #1 *x*, *y*, *z*+1. #2 *x*, *y*–1, *z*+1.

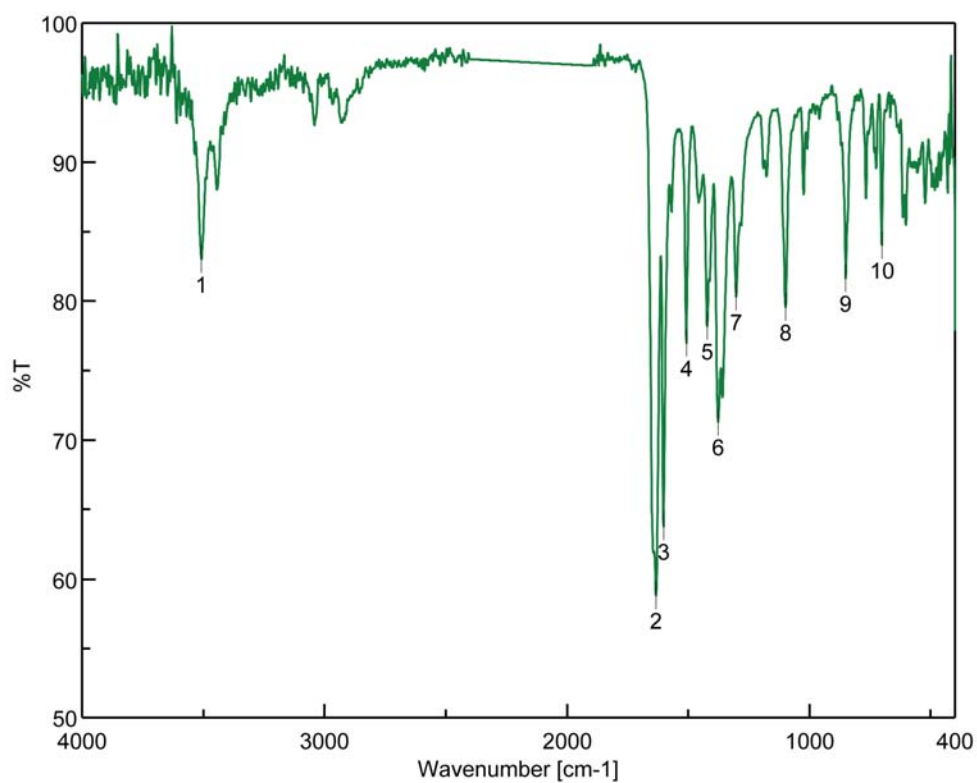

| No. | cm <sup>-1</sup> | %T      | No. | cm <sup>-1</sup> | %T      |
|-----|------------------|---------|-----|------------------|---------|
| 1   | 3507.88          | 82.9828 | 2   | 1633.41          | 58.8259 |
| 3   | 1602.56          | 63.8032 | 4   | 1508.06          | 76.9477 |
| 5   | 1422.24          | 78.1575 | 6   | 1376.93          | 71.275  |
| 7   | 1302.68          | 80.2796 | 8   | 1099.23          | 79.5606 |
| 9   | 850.454          | 81.6222 | 10  | 701.962          | 84.0191 |

Fig. S3 Solid-state IR spectrum of ligand **1** with ATR method.

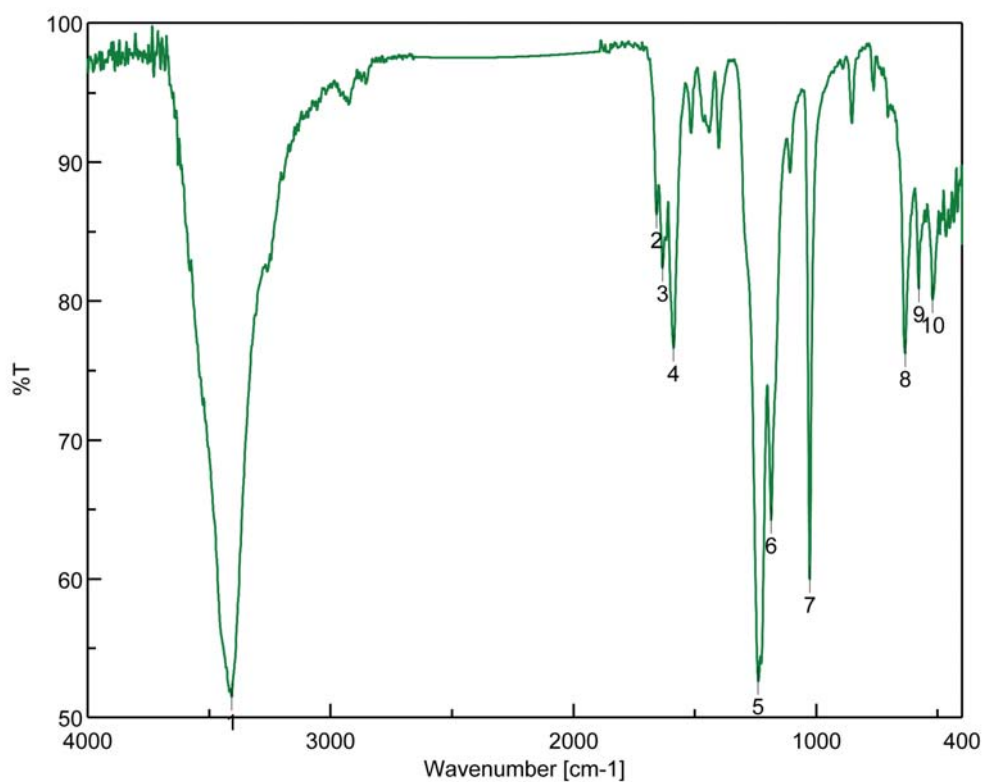

| No. | cm <sup>-1</sup> | %T      | No. | cm <sup>-1</sup> | %T      |
|-----|------------------|---------|-----|------------------|---------|
| 1   | 3406.64          | 51.4996 | 2   | 1657.52          | 86.1978 |
| 3   | 1633.41          | 82.3524 | 4   | 1587.13          | 76.6163 |
| 5   | 1239.04          | 52.6362 | 6   | 1186.01          | 64.2419 |
| 7   | 1026.91          | 59.9545 | 8   | 634.466          | 76.2217 |
| 9   | 578.54           | 80.8866 | 10  | 520.686          | 80.0935 |

Fig. S4 Solid-state IR spectrum of complex 1-La with ATR method.

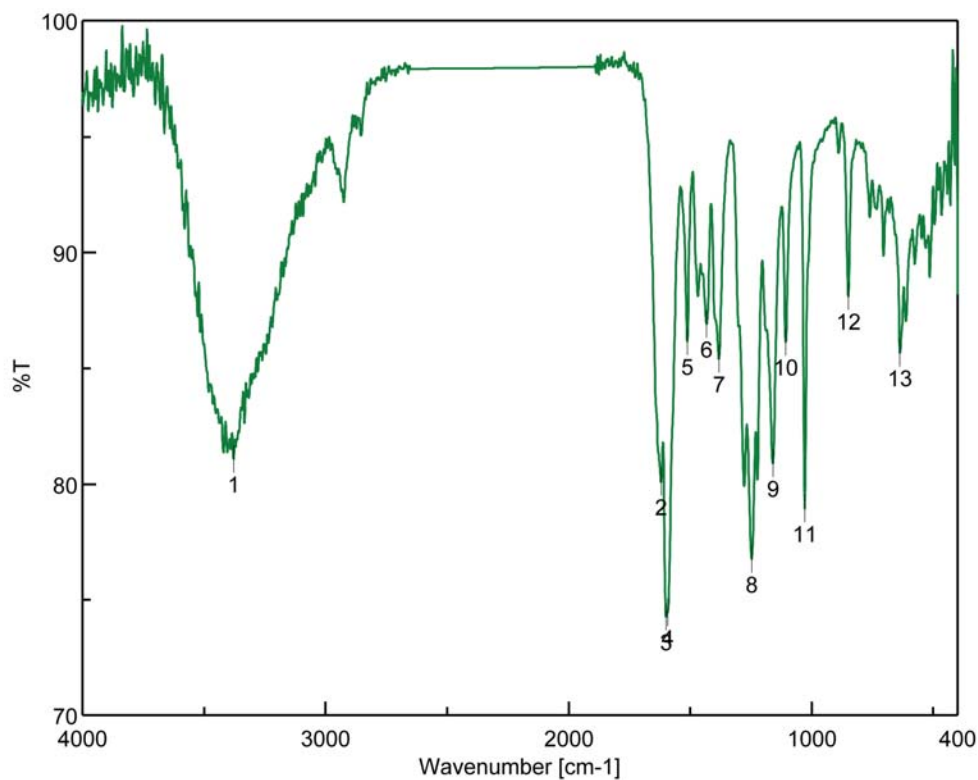

| No. | cm <sup>-1</sup> | %T      | No. | cm <sup>-1</sup> | %T      |
|-----|------------------|---------|-----|------------------|---------|
| 1   | 3378.67          | 81.0816 | 2   | 1619.91          | 80.088  |
| 3   | 1599.66          | 74.2541 | 4   | 1592.91          | 74.4541 |
| 5   | 1511.92          | 86.1586 | 6   | 1432.85          | 86.8998 |
| 7   | 1381.75          | 85.4027 | 8   | 1247.72          | 76.7546 |
| 9   | 1159.97          | 80.8808 | 10  | 1106.94          | 86.1259 |
| 11  | 1028.84          | 78.9324 | 12  | 849.49           | 88.1071 |
| 13  | 637.358          | 85.6657 |     |                  |         |

Fig. S5 Solid-state IR spectrum of complex 1-Yb with ATR method.
